# Supplementary material for: Cryoablation triggers type I interferon-dependent antitumor immunity and potentiates immunotherapy efficacy in lung cancer
Source: HighWire-hosted journal article supplement (doi:10.1136/jitc-2023-008386), 2024-01-01
Supplement: jitc-2023-008386supp001_data_supplement.pdf [file jitc-2023-008386supp001_data_supplement.pdf]

## 1 **Supplementary Methods**

### 2 **Mouse lung cancer allograft assay and treatments**

3 A total of  $1 \times 10^6$  KP, KL or LLC cells were injected subcutaneously into the bilateral flanks of  
4 female C57BL/6 mice, respectively. The treatment was administered when the tumor volume  
5 (calculated as width  $\times$  length) reached approximately  $50 \text{ mm}^2$ . All cryoablation procedures were  
6 carried out only on the left tumor, using the Cryotherapy System device and a 1.2-mm-diameter  
7 cryoprobe (AccuTarget MediPharma [Shanghai] Co., Ltd.), which used nitrogen as the refrigerant.  
8 The tip of the cryoprobe was inserted into the tumor along its long axis, and then 2 freeze-thaw  
9 cycles (20 and 10 seconds, respectively, for each cycle) were performed. During the freezing  
10 phase, the temperature at the tip of the cryoprobe could reached below  $-80^\circ\text{C}$ . The target tumor  
11 was entirely covered by the ice ball to ensure complete ablation. The growth of contralateral  
12 tumors was monitored every 2 days.

13 IFNAR1 blockade was accomplished by administering  $400 \mu\text{g}$  anti-IFNAR1 (clone MAR1-5A3,  
14 BioXCell) or isotype control monoclonal antibody (BioXCell) intraperitoneally every 3 days for a  
15 total of 4 doses. For PD-1 blockade,  $200 \mu\text{g}$  anti-PD-1 (clone MP1-14, BioXCell) or isotype  
16 control monoclonal antibody (BioXCell) was administered intraperitoneally at day 1, 4, 7 and 10  
17 after cryoablation (figure 6B).

18

### 19 **Sham treatment and cryoablation**

20 The treatment was administered when the tumor volume (calculated as width  $\times$  length) reached  
21 approximately  $50 \text{ mm}^2$ . The experimental grouping is shown in supplementary figure S2A. In  
22 non-CA group, no treatment was received. In sham treatment group, cryoprobe was inserted into

23 the left tumor without cryoablation. In sham CA group, CA was performed in subcutaneous tissue  
24 ensuring no damage to the implanted tumor. In CA group, CA was performed in tumor tissues.  
25 The growth of contralateral tumors was monitored every 2 days.

26

### 27 **Data analysis for bulk RNA sequencing**

28 Genome index and raw gene expression matrix for each sample were generated from raw fastq  
29 data using *STAR* (v2.7.6a) [1]. The combined gene expression matrix was then generated by  
30 customized scripts for *R* (v4.1.3). Subsequently, the gene expression matrix was converted to a  
31 *DESeqDataSet* object using *DESeq2* R package (v1.34.0) [2]. Normalization was performed by  
32 *DESeq2* and DEGs were selected by adjusted p-value < 0.05. Gene set signatures were computed  
33 using the average gene expression and *GSVA* (v1.42.0) R package based on Hallmark gene sets  
34 (h.all.v7.4.symbols.gmt) and some manually curated pathways. To visualize gene expression and  
35 gene set activity, the heatmaps were generated using *ComplexHeatmap* R package (v2.10.0) [3].

36

### 37 **Flow cytometric analysis**

#### 38 *Preparation of mouse tumors*

39 Freshly harvested tumors were treated with the Mouse Tumor Dissociation Kit (Miltenyi Biotec)  
40 to generate single-cell suspension for flow cytometry following the manufacturer's instructions.  
41 Subsequently, the dissociated tumor samples were filtered through a 70- $\mu$ m strainer, followed by  
42 centrifugation using Percoll reagent (GE) to enrich immune cells. Erythrocytes were lysed with  
43 lysis buffer (Beyotime) for 5 min at RT and washed twice with PBS.

#### 44 *Staining*

45 To detect intracellular cytokine production, cells were stimulated with Cell Stimulation Cocktail  
46 (plus protein transport inhibitors) (1:500, eBioscience) for 4 hours in a 37°C and 5% CO<sub>2</sub>  
47 incubator, and washed twice with FACS buffer (PBS + 2% FBS + 1mM EDTA) before staining.  
48 For live-dead discrimination, cells were stained with Zombie UV™ Fixable Viability Kit  
49 (Biolegend) for 30 min at RT in the dark. For surface marker analysis, cells were stained with  
50 indicated fluorochrome-conjugated antibodies in FACS buffer for 30 minutes. For intracellular  
51 marker staining, the Transcription Factor Buffer Set (BD Pharmingen) was utilized following the  
52 manufacturer's instructions, and then stained with indicated fluorochrome-conjugated antibodies.  
53 All samples were washed with washing buffer (BD Pharmingen) after each staining. At last, all  
54 samples further passed through a 70-µm cell strainer. The antibodies used for flow cytometry  
55 staining were listed in supplemental table S2. Flow cytometry was performed using BD FACS  
56 Fortessa. Data were analyzed with FlowJo 10.8.1 software. Appropriate isotype controls were used  
57 as negative controls.

58

59 **Quality control, determination of major cell lineages and subclustering of T cells and**  
60 **myeloid populations**

61 *Cell Ranger* (v6.0.1) *count* was used to aggregate the raw gene expression matrix from the initial  
62 raw fastq data of each sample, which was converted to a Seurat object using *Seurat* R package  
63 (v4.1.1) [4]. The gene expression was normalized by the SCT method [5] and a total of 17,670 and  
64 40,917 high-quality cells were finally obtained for CD45<sup>+</sup> and CD45<sup>+</sup>CD3<sup>+</sup> scRNA-seq  
65 respectively. Cell clusters projected in the two-dimensional *UMAP* representation were annotated  
66 to known cell types using well-recognized marker genes.

67 To further identify subpopulations within the major cell clusters from CD45<sup>+</sup> 3' scRNA-seq, a  
68 second-round data process, dimension reduction and cell type annotation were performed for T  
69 and myeloid cells separately. The subset gene expression matrix was normalized by the  
70 *LogNormalize* method, and a total of 12 subclusters were obtained. To validate the accuracy of our  
71 annotation results, *ProjectTIL* analysis [6] (*ProjectTILs* R package, v2.0.0) was performed with the  
72 'mouse TIL atlas' as a reference atlas, and most of cell types were well-matched. Myeloid cells,  
73 including mast cells, underwent a similar re-clustering pipeline as T cells, resulting in the  
74 identification of 8 clusters.

75

#### 76 **Analysis of pathway enrichment and gene signatures**

77 DEGs were identified using the Wilcoxon Rank Sum test between the non-CA and CA groups,  
78 either across all cells or within specific cell clusters by *Seurat* R package with default parameters.  
79 A maximum of 120 DEGs with a logFC\_threshold > 0.25 were selected. GO enrichment analysis  
80 was performed with *clusterProfiler* R package (v4.2.2) based on the up-regulated DEGs in the CA  
81 group. The results were visualized through barplots generated by *ggplot2* R package (v3.4.1).

82 Gene set signatures from both bulk RNA-seq and 3' scRNA-seq, including the effector  
83 signature, cytolytic score and IFN response signature of CD8<sup>+</sup> T cells, and type I IFN production  
84 were computed using the average gene expression and *GSEA* (v1.42.0) R package based on  
85 Hallmark gene sets (h.all.v7.4.symbols.gmt), GO gene sets (c5.go.v7.4.symbols.gmt) from  
86 MSigDB and some manually curated pathways. Naïve and exhaustion scores of CD8<sup>+</sup> T cells were  
87 performed by a customized R script, following the methodology established by Gong et al [7]. In  
88 brief, logistic regression models were developed for each gene module and corresponding cell

89 clusters, and then the module score for each cell was calculated by summing the product of each  
90 gene expression and weights estimated from the model parameters. The heatmap was plotted using  
91 *ComplexHeatmap* with P-value and Z-score computed by R, and the boxplots were plotted using  
92 *ggplot2* with statistical tests performed by *ggpubr* R package (v0.4.0).

93

#### 94 **Pseudotime trajectory analysis of CD8<sup>+</sup> T cells and myeloid populations**

95 Pseudotime trajectory analysis of CD8<sup>+</sup> T cells was performed by *Monocle v3* R package (v1.0.0)  
96 [8]. Pseudotime values were calculated, and the trajectory paths and directions were computed.  
97 *Monocle v3* and *ggplot2* R package were used to visualize the pseudotime trajectory. Pseudotime  
98 trajectory analysis of Myeloid cells was performed by *Monocle v2* R package (v2.22.0) [9]. The  
99 two-dimensional components and pseudotime values by *Monocle v2* were merged into the Seurat  
100 object, and *Seurat* and *ggplot2* were used to visualize the pseudotime trajectory.

101

#### 102 **Clonotype diversity analysis and CoNGA**

103 *Immunarch* R package (v0.8.0) was applied to read and process the clonotype data from outputs of  
104 *CellRanger vdj*. The clonotype data was then integrated with cell attributes from scRNA-seq data  
105 based on shared cell barcodes. The clonal expansion score, as defined by Wang et al. [10], was  
106 calculated and compared in T cell clusters between non-CA and CA groups.

107 To enhance the integration of information between scRNA-seq and scTCR-seq, we performed  
108 *CoNGA* (*CoNGA* python package, v0.1) analysis [11]. In brief, *CoNGA* uses TCRdist to cluster  
109 immune repertoire (IR) data and generate a cell-cell relationship network from the IR.  
110 Simultaneously, it generates a cell-cell relationship network from gene expression (GEX) using

111 Scanpy. Subsequently, CoNGA integrates the GEX and IR networks by identifying nodes that  
112 share similar neighbors in both networks. By employing CoNGA approach, we acquired 23,739  
113 paired cells which was reduced into 15,055 clones. Each clone was assigned a CoNGA score  
114 through the *CoNGA* pipeline.

115

#### 116 **Multiplex immunoassay**

117 The mouse tumor tissues were homogenized (1:9) in PBS for 4 minutes, and then were centrifuged  
118 at 12,000 rpm for 5 minutes at 4°C. Supernatants were collected and the protein level of IFN- $\alpha$   
119 and IFN- $\beta$  was detected using LEGENDplex™ Mouse Type 1/2 Interferon Panel (Biolegend)  
120 according to the manufacturer's instructions. Briefly, 25 $\mu$ l supernatant or standard was mixed with  
121 25 $\mu$ l assay buffer and mixed capture beads, and then incubated for 2 hours at room temperature.  
122 After washing the plate, 25 $\mu$ l detection antibodies were added to each well and incubated for 1  
123 hour at room temperature. Then SA-PE was added directly and incubated for 30 min at room  
124 temperature. After washing, all samples were read on Beckman Coulter CytoFLEX S. The assay  
125 FCS files were analyzed to calculate the concentration of IFN- $\alpha$  and IFN- $\beta$  using BioLegend's  
126 LEGENDplex™ data analysis software.

127

#### 128 **Western blot analysis**

129 Mouse tumor tissues were lysed using RIPA lysis buffer (P0013B, Beyotime) containing a  
130 protease inhibitor (1:100, Beyotime) and a phosphatase inhibitor (1:100, Epizyme).  
131 Approximately 30–50  $\mu$ g of total protein was separated on 10% SDS-PAGE, transferred onto a  
132 0.45- $\mu$ m PVDF membrane, blocked with 5% non-fat milk, and incubated overnight at 4 °C with

133 primary antibodies against indicated antibodies (supplementary table S2). Antibodies were  
134 removed from the membrane by incubation with stripping buffer (Beyotime) for 15 min.

135

### 136 **Statistics**

137 All statistical analyses in the experiments were performed using SPSS 25.0 (IBM, New York, NY,  
138 USA) and GraphPad Prism 8.0 (GraphPad Software, San Diego, California, USA).  $P$ -value  $\leq 0.05$   
139 was considered significant difference. Data are expressed as mean  $\pm$  SEM. The two-sided unpaired  
140 Student's  $t$ -test was used for comparison of two groups (non-CA and CA group; before and after  
141 the cryoablation). ANOVA test was used for comparisons of groups in studies involving combined  
142 therapy (PD-1 blockade and IFNAR-1 blockade). Survival curves were analyzed by log-rank  
143 (Mantel Cox) test.

144 All statistical analyses of omics data were performed using R (v4.1.3). Z-score normalization  
145 was applied for better visualization in the heatmap.  $P$ -value  $\leq 0.05$  was considered significant  
146 difference. The one-sided unpaired Student's  $t$ -test was used for comparison of gene expression  
147 and signature scores between the non-CA and CA groups in bulk RNA-seq data. For single-cell  
148 analysis, comparisons between two groups were performed using the nonparametric Wilcoxon  
149 rank sum test with Bonferroni correction.

150

### 151 **References**

- 152 1. Dobin A, Davis CA, Schlesinger F et al. STAR: ultrafast universal RNA-seq aligner.  
153 *Bioinformatics* 2013; 29: 15-21.
- 154 2. Anders S, Huber W. Differential expression analysis for sequence count data. *Genome Biol*

- 155 2010; 11: R106.
- 156 3. Gu Z, Eils R, Schlesner M. Complex heatmaps reveal patterns and correlations in  
157 multidimensional genomic data. *Bioinformatics* (Oxford, England) 2016; 32: 2847-2849.
- 158 4. Hao Y, Hao S, Andersen-Nissen E, Mauck WM, 3rd, Zheng S, Butler A, et al. Integrated  
159 analysis of multimodal single-cell data. *Cell*. 2021;184(13):3573-87 e29.
- 160 5. Hafemeister C, and Satija R. Normalization and variance stabilization of single-cell RNA-seq  
161 data using regularized negative binomial regression. *Genome Biol*. 2019;20(1):296.
- 162 6. Andreatta M, Corria-Osorio J, Muller S, Cubas R, Coukos G, and Carmona SJ. Interpretation  
163 of T cell states from single-cell transcriptomics data using reference atlases. *Nat Commun*.  
164 2021;12(1):2965.
- 165 7. Gong L, Kwong DL, Dai W, Wu P, Li S, Yan Q, et al. Comprehensive single-cell sequencing  
166 reveals the stromal dynamics and tumor-specific characteristics in the microenvironment of  
167 nasopharyngeal carcinoma. *Nat Commun*. 2021;12(1):1540.
- 168 8. Cao J, Spielmann M, Qiu X, Huang X, Ibrahim DM, Hill AJ, et al. The single-cell  
169 transcriptional landscape of mammalian organogenesis. *Nature*. 2019;566(7745):496-502.
- 170 9. Qiu X, Mao Q, Tang Y, Wang L, Chawla R, Pliner HA, et al. Reversed graph embedding  
171 resolves complex single-cell trajectories. *Nat Methods*. 2017;14(10):979-82.
- 172 10. Wang J, Xu Y, Chen Z, Liang J, Lin Z, Liang H, et al. Liver Immune Profiling Reveals  
173 Pathogenesis and Therapeutics for Biliary Atresia. *Cell*. 2020;183(7):1867-83 e26.
- 174 11. Schattgen SA, Guion K, Crawford JC, Souquette A, Barrio AM, Stubbington MJT, et al.  
175 Integrating T cell receptor sequences and transcriptional profiles by clonotype neighbor graph  
176 analysis (CoNGA). *Nat Biotechnol*. 2022;40(1):54-63.



177

**Supplemental Table S1. Mouse primers used in this study**

| Gene           | Forward Primer (5'-3')  | Reverse Primer (5'-3')   |
|----------------|-------------------------|--------------------------|
| <i>Il21</i>    | GGACCCTTGTCTGTCTGGTAG   | TGTGGAGCTGATAGAAGTTCAGG  |
| <i>Ccl5</i>    | GCTGCTTTGCCTACCTCTCC    | TCGAGTGACAAACACGACTGC    |
| <i>Ccl17</i>   | TACCATGAGGTCACCTCAGATGC | GCACTCTCGGCCTACATTGG     |
| <i>Ccl22</i>   | AGGTCCCTATGGTGCCAATGT   | CGGCAGGATTTTGAGGTCCA     |
| <i>Cxc19</i>   | GGAGTTCGAGGAACCCTAGTG   | GGGATTTGTAGTGGATCGTGC    |
| <i>Tnf</i>     | CCCTCACACTCAGATCATCTTCT | GCTACGACGTGGGCTACAG      |
| <i>Ifna</i>    | TGACCTCAAAGCCTGTGTGATG  | AAGTATTTCCCTCACAGCCAGCAG |
| <i>Ifnb</i>    | AGCTCCAAGAAAGGACGAACAT  | GCCCTGTAGGTGAGGTTGATCT   |
| <i>Cd274</i>   | GCTCCAAGGACTTGTACGTG    | TGATCTGAAGGGCAGCATTTTC   |
| <i>β-actin</i> | TGTCCACCTTCCAGCAGATGT   | AGCTCAGTAACAGTCCGCCTAG   |

178

**Supplemental Table S2. The antibodies used for flow cytometry, WB and multiple-color fluorescence IHC**

| Antibodies                                | Clone    | Source      | Identifier      |
|-------------------------------------------|----------|-------------|-----------------|
| Zombie UV™ Fixable Viability Kit          | /        | Biolegend   | Cat# 423107     |
| BV510 anti-mouse CD45                     | 30-F11   | Biolegend   | Cat# 103138     |
| AF700 anti-mouse CD3                      | 17A2     | Biolegend   | Cat# 100216     |
| FITC anti-mouse CD4                       | RM4-5    | Biolegend   | Cat# 100510     |
| PerCP/Cyanine5.5 anti-mouse CD8a          | 53-6.7   | Biolegend   | Cat# 100734     |
| BV605 anti-mouse NK1.1                    | PK136    | Biolegend   | Cat# 108753     |
| BV605 anti-mouse PD-1                     | 29F.1A12 | Biolegend   | Cat# 135220     |
| BV421 anti-mouse CD25                     | PC61     | Biolegend   | Cat# 102043     |
| PE anti-mouse FOXP3                       | NRRF-30  | eBioscience | Cat# 12-4771-82 |
| PE/Dazzle 594 anti-mouse IFN- $\gamma$    | XMG1.2   | Biolegend   | Cat# 505846     |
| PE anti-mouse TNF- $\alpha$               | MP6-XT22 | Biolegend   | Cat# 506306     |
| PE/Cyanine7 anti-human/mouse Granzyme B   | QA16A02  | Biolegend   | Cat# 372214     |
| BV510 anti-human CD45                     | HI30     | Biolegend   | Cat# 304036     |
| PerCP/Cyanine5.5 anti-human CD3           | OKT3     | Biolegend   | Cat# 317226     |
| AF700 anti-human CD4                      | OKT4     | Biolegend   | Cat# 317426     |
| APC/Cyanine7 anti-human CD8               | SK1      | Biolegend   | Cat# 344714     |
| BV605 anti-human CD45RA                   | HI100    | Biolegend   | Cat# 304134     |
| BV421 anti-human CD197 (CCR7)             | G043H7   | Biolegend   | Cat# 353208     |
| PE/Dazzl 594 anti-human FOXP3             | 206D     | Biolegend   | Cat# 320126     |
| Rabbit anti-mouse p-STING (Ser365) mAb    | D8W4F    | CST         | Cat# 72971      |
| Rabbit anti-mouse STING mAb               | D2P2F    | CST         | Cat# 13647      |
| Rabbit anti-mouse p-TBK1/NAK (Ser172) mAb | D52C2    | CST         | Cat# 5483       |
| Rabbit anti-mouse TBK1/NAK mAb            | D1B4     | CST         | Cat# 3504       |
| Rabbit anti-mouse $\beta$ -Actin mAb      | 13E5     | CST         | Cat# 4970       |
| Anti-rabbit IgG, HRP-linked Antibody      | 7074S    | CST         | Cat# 7074       |
| Mouse monoclonal anti-human Pan-CK        | AE1/AE3  | Abcam       | Cat# ab27988    |
| Rabbit monoclonal anti-human CD4          | EPR6855  | Abcam       | Cat# ab133616   |
| Mouse monoclonal anti-human CD8 alpha     | C8/144B  | Abcam       | Cat# ab17147    |

179

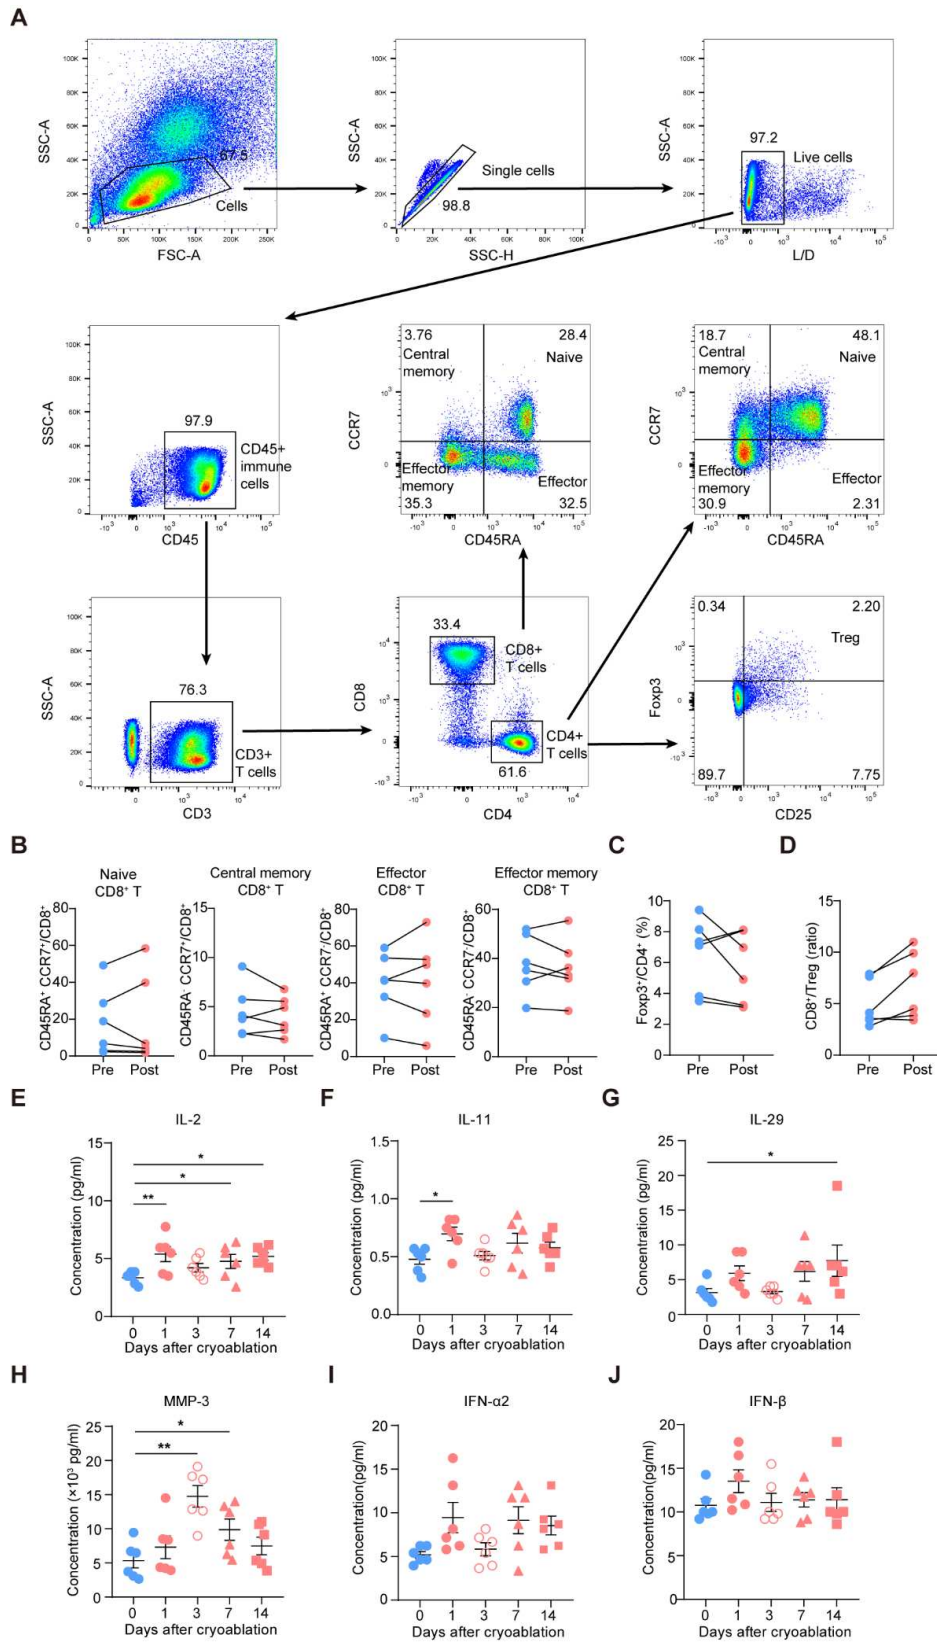

181 **Supplementary Figure S1. The effect of cryoablation on peripheral blood from early-stage**

182 **NSCLC patients.**

183 (A) The gating strategy of flow cytometric analysis on peripheral blood mononuclear cells.

184 (B-D) The changes in the percentage of subpopulations of CD8<sup>+</sup> T cells (B), the percentage of

185 Foxp3<sup>+</sup> Tregs (C) and the ratio of CD8<sup>+</sup> T cells to Tregs (D) in the peripheral blood samples

186 collected before cryoablation and at day 1 after cryoablation from early-stage NSCLC patients (n

187 = 6).

188 (E-J) The changes in the levels of IL-2, IL-11, IL-29, MMP-3, IFN- $\alpha$  and IFN- $\beta$  secretion in the

189 peripheral blood samples collected before cryoablation and at day 1, 3, 7 and 14 after cryoablation

190 from early-stage NSCLC patients (n = 6).

191 The results are shown as the mean  $\pm$  SEM. The statistical significance of differences between two

192 groups was determined by unpaired Student's t-test and the statistical significance of differences

193 among multiple groups was determined by one-way ANOVA. \*, P < 0.05; \*\*, P < 0.01. IL,

194 interleukin; IFN, interferon; MMP, matrix metalloproteinase; NSCLC, non-small cell lung cancer;

195 SSC, side scatter.

196

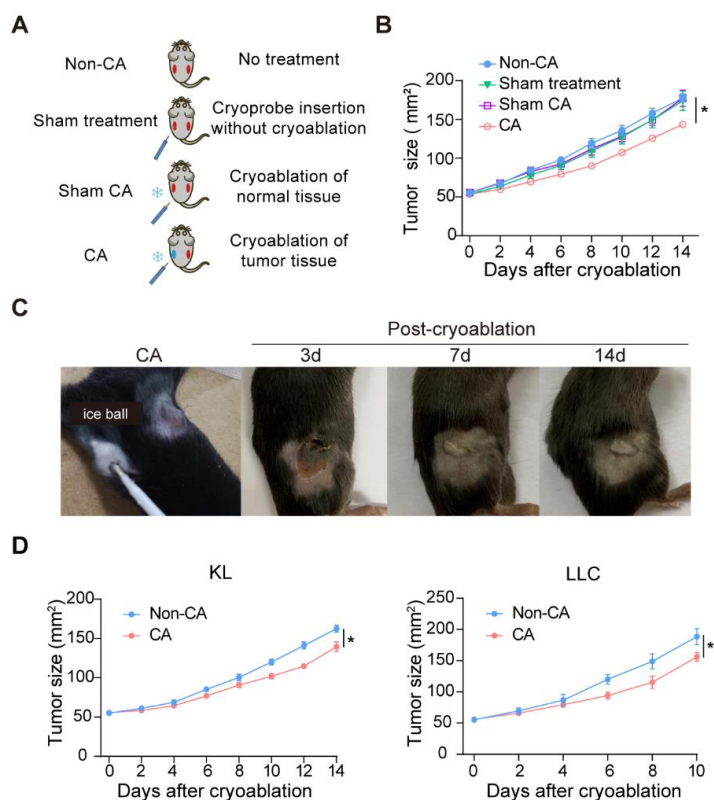

197

198 **Supplementary Figure S2. The effect of cryoablation on tumor growth.**

199 (A) The experimental design. In non-CA group, no treatment was received. In sham treatment  
 200 group, the cryoprobe was inserted into the left tumor without cryoablation. In sham CA  
 201 was performed in subcutaneous tissue and skin ensuring no damage to the implanted tumor. In CA  
 202 group, CA was performed in tumor tissues.

203 (B) Mean tumor growth of the contralateral KP tumors in the non-CA, sham treatment, sham CA  
 204 and CA groups (n=5 per group).

205 (C) The changes of the cryoablated tumor during cryoablation and at day 3, 7 and 14 after  
 206 cryoablation.

207 (D) Mean tumor growth of the contralateral KL and Lewis lung cancer (LLC) tumors in the  
 208 non-CA and CA groups (n = 6 per group).

209 The results are shown as the mean  $\pm$  SEM. The statistical significance of differences between two  
210 groups was determined by unpaired Student's t-test. \*, P < 0.05. CA, cryoablation; non-CA,  
211 non-cryoablation.  
212

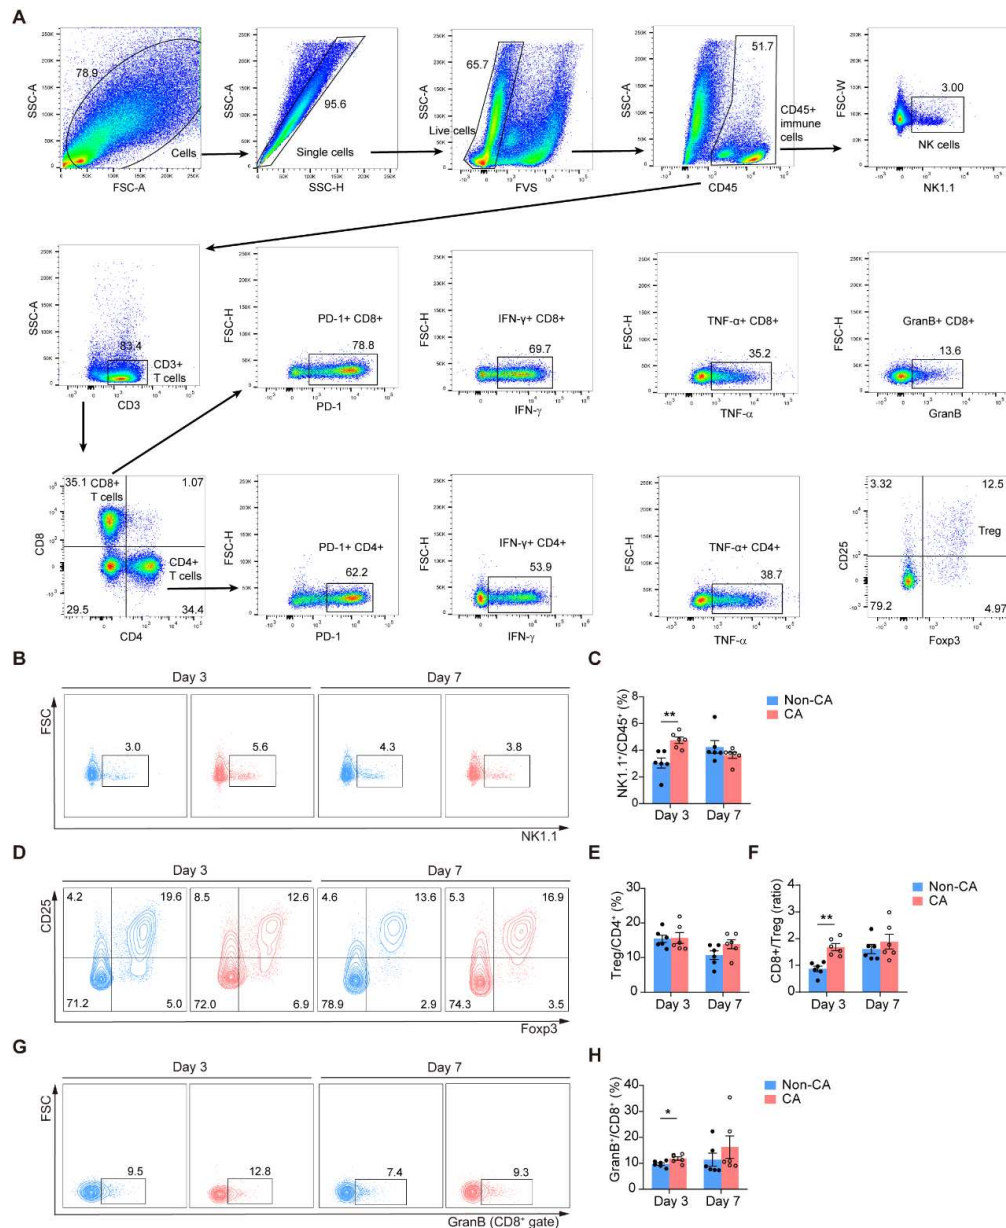

213

214 **Supplementary Figure S3. Regulation of immune cell infiltration in contralateral KP tumors**215 **by cryoablation.**

216 (A) The gating strategy of flow cytometric analysis on KP tumor infiltrating immune cells.

217 (B and C) Representative flow cytometric plots (B) and the percentage (C) of NK1.1+ natural

218 killer (NK) cells in contralateral KP tumors from the non-CA and CA groups at day 3 and 7 after



219 cryoablation (n = 6 per group).  
220 (D and E) Representative flow cytometric plots (D) and the percentage (E) of CD25+Foxp3+  
221 Tregs in contralateral KP tumors from the non-CA and CA groups at day 3 and 7 after  
222 cryoablation (n = 6 per group).  
223 (F) The ratio of CD8+ TILs to Tregs in the non-CA and CA groups (n = 6 per group).  
224 (G and H) Representative flow cytometric plots (G) and the percentage (H) of GranB+CD8+ TILs  
225 in contralateral KP tumors from the non-CA and CA groups at day 3 and 7 after cryoablation (n =  
226 6 per group).  
227 The results are shown as the mean  $\pm$  SEM, and the statistical significance of differences between  
228 groups was determined by an unpaired Student's t-test. \*, P < 0.05; \*\*, P < 0.01. CA, cryoablation;  
229 non-CA, non-cryoablation.  
230

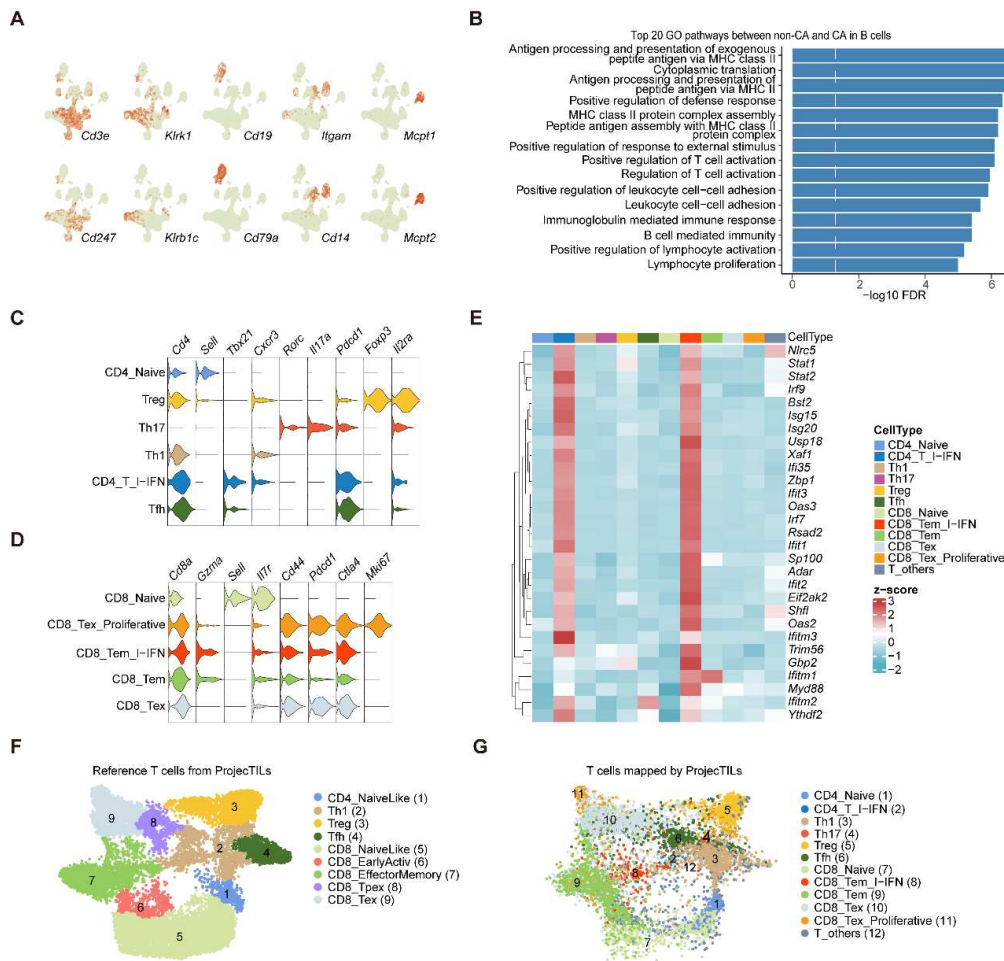

231

232 **Supplementary Figure S4. Transcriptional profiling of tumor-infiltrating immune cells.**

233 (A) Single-cell transcription level of representative genes illustrated in the UMAP plot of  
 234 tumor-infiltrating CD45+ immune cells.

235 (B) GO pathway enrichment analysis of B cells based on the DEGs between the non-CA  
 236 groups.

237 (C and D) Single-cell transcription level of representative genes from CD4+ (C) and CD8+ (D)  
 238 TILs illustrated in the UMAP plot of CD3+CD45+ T cells.

239 (E) Heatmap showing expression of type I IFN-related genes in each T cell type.

240 (F and G) Validation of T cells clustering using ProjecTIL. The graphs represent a reference atlas

- 241 from ProjectTILs (F)and our clustering of T cells mapped by ProjectTILs (G).
- 242 CA, cryoablation; non-CA, non-cryoablation.
- 243

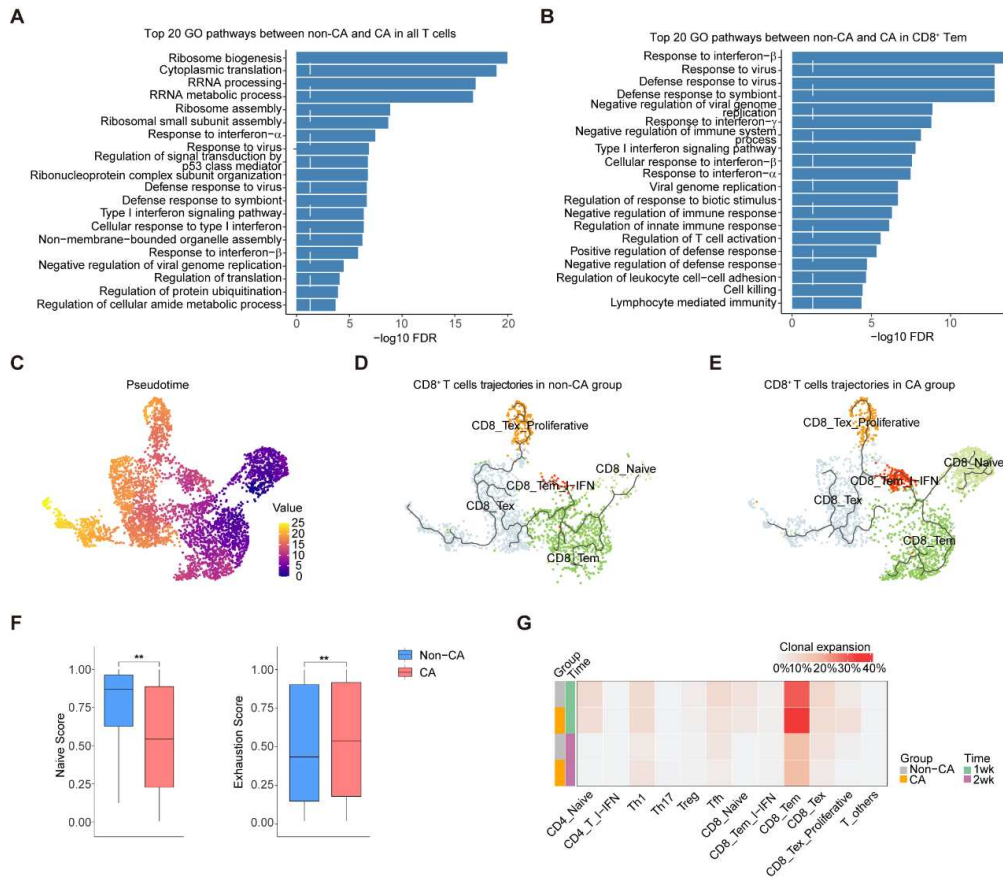

244

245 **Supplementary Figure S5. Expansion of T cells exhibiting upregulated responses to type I**246 **IFN pathway and exhaustion features post-cryoablation.**247 (A and B) GO pathway enrichment analysis of all T cells and CD8<sup>+</sup> effector memory T cells based

248 on the DEGs between the non-CA and CA groups.

249 (C-E) The pseudotime developmental trajectory performed on CD8<sup>+</sup> T cells. The graphs represent

250 pseudotime values (C), pseudotime trajectory in the non-CA (D) and CA (E) groups.

251 (F) Box plot indicating naïve and exhaustion scores of CD8<sup>+</sup> T cells at 1 week after cryoablation.

252 (G) Heatmap showing clonal expansion in T cell clusters across groups at 1 week and 2 weeks

253 after cryoablation.

254 The statistical significance of differences between groups was determined by the nonparametric

255 Wilcoxon rank sum test with Bonferroni correction. \*\*,  $P < 0.01$ . CA, cryoablation; non-CA,  
256 non-cryoablation.  
257

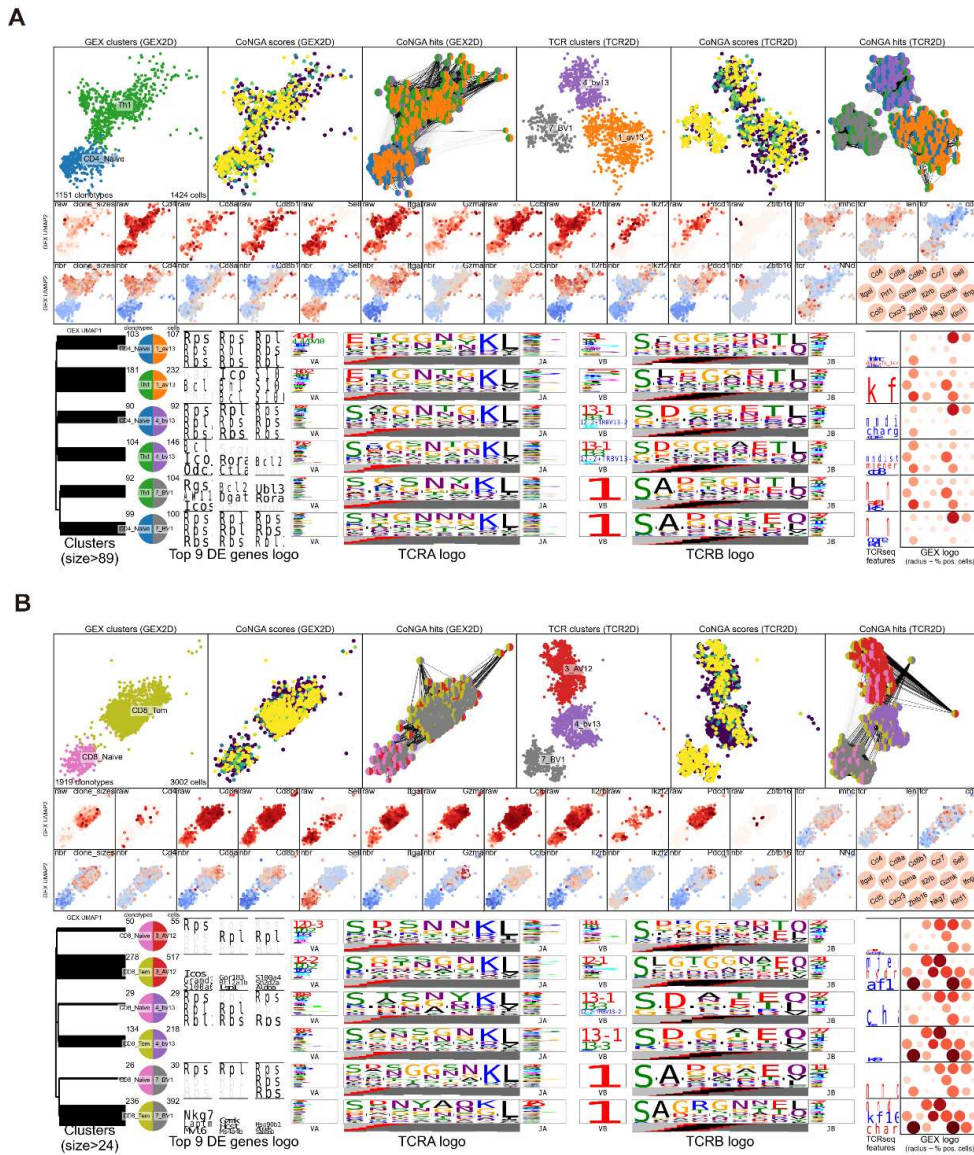

258

259 **Supplementary Figure S6. Expansion of initially activated naive T cells induced by**  
 260 **cryoablation.**

261 (A and B) CoNGA analysis of naive CD4+ (A) and CD8+ (B) T cells.

262



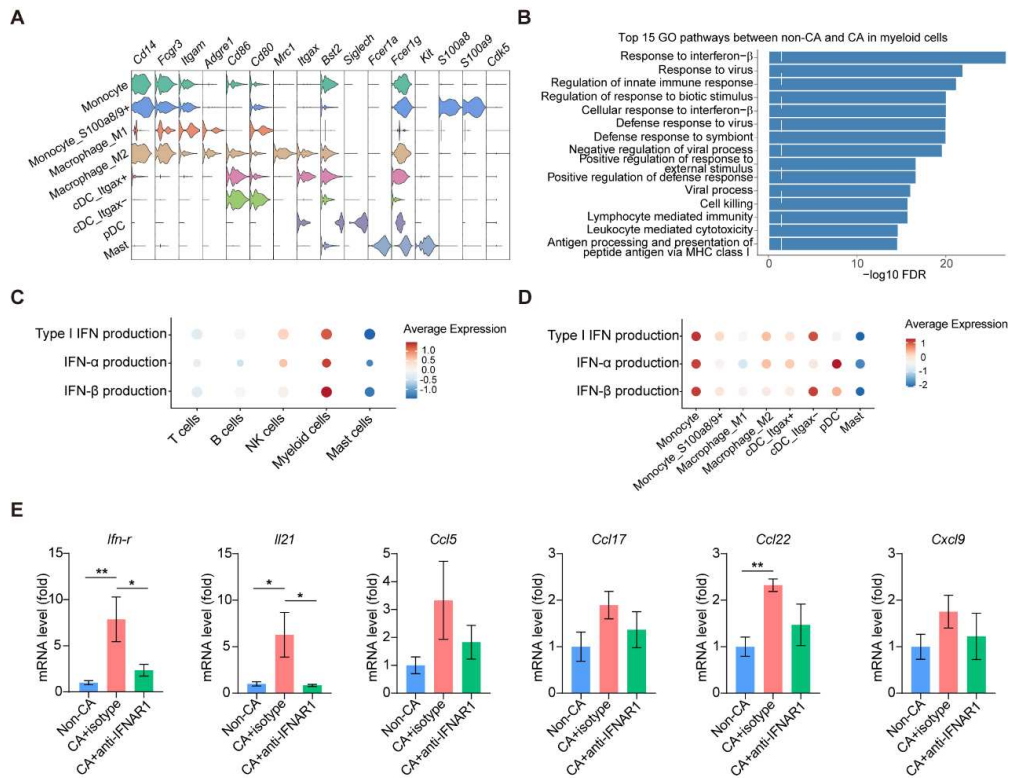

263

264 **Supplementary Figure S7. Upregulation of responses to type I IFN in myeloid cells after**265 **cryoablation and changes of intra-tumoral cytokines and chemokines upon IFNAR1**266 **blockade.**

267 (A) Single-cell transcription level of representative genes illustrated in the UMAP plot of myeloid

268 cells.

269 (B) GO pathway enrichment analysis of myeloid cells based on the DEGs between the non-CA

270 and CA groups.

271 (C and D) Type I IFN production analysis in different cell types (C) and subpopulations of

272 myeloid cells (D).

273 (E) mRNA levels of intra-tumoral cytokines and chemokines after the treatment of cryoablation

274 combined with an anti-IFNAR1 blocking antibody or an isotype control monoclonal antibody (n =

- 275 5 per group).
- 276 The statistical significance of differences among multiple groups was determined by one-way
- 277 ANOVA. \*,  $P < 0.05$ ; \*\*,  $P < 0.01$ . CA, cryoablation; non-CA, non-cryoablation.
